# Supplementary material for: Repeat RNAs associate with replication forks and post-replicative DNA
Source: PubMed Central journal article supplement — RNA. 2020 Sep;26(9):1104–17. doi: 10.1261/rna.074757.120 (PMC7430672; doi:10.1261/rna.074757.120), 2020-09
Supplement: supp_074757.120_Supplemental_Fig_S3.pdf [file supp_074757.120_Supplemental_Fig_S3.pdf]

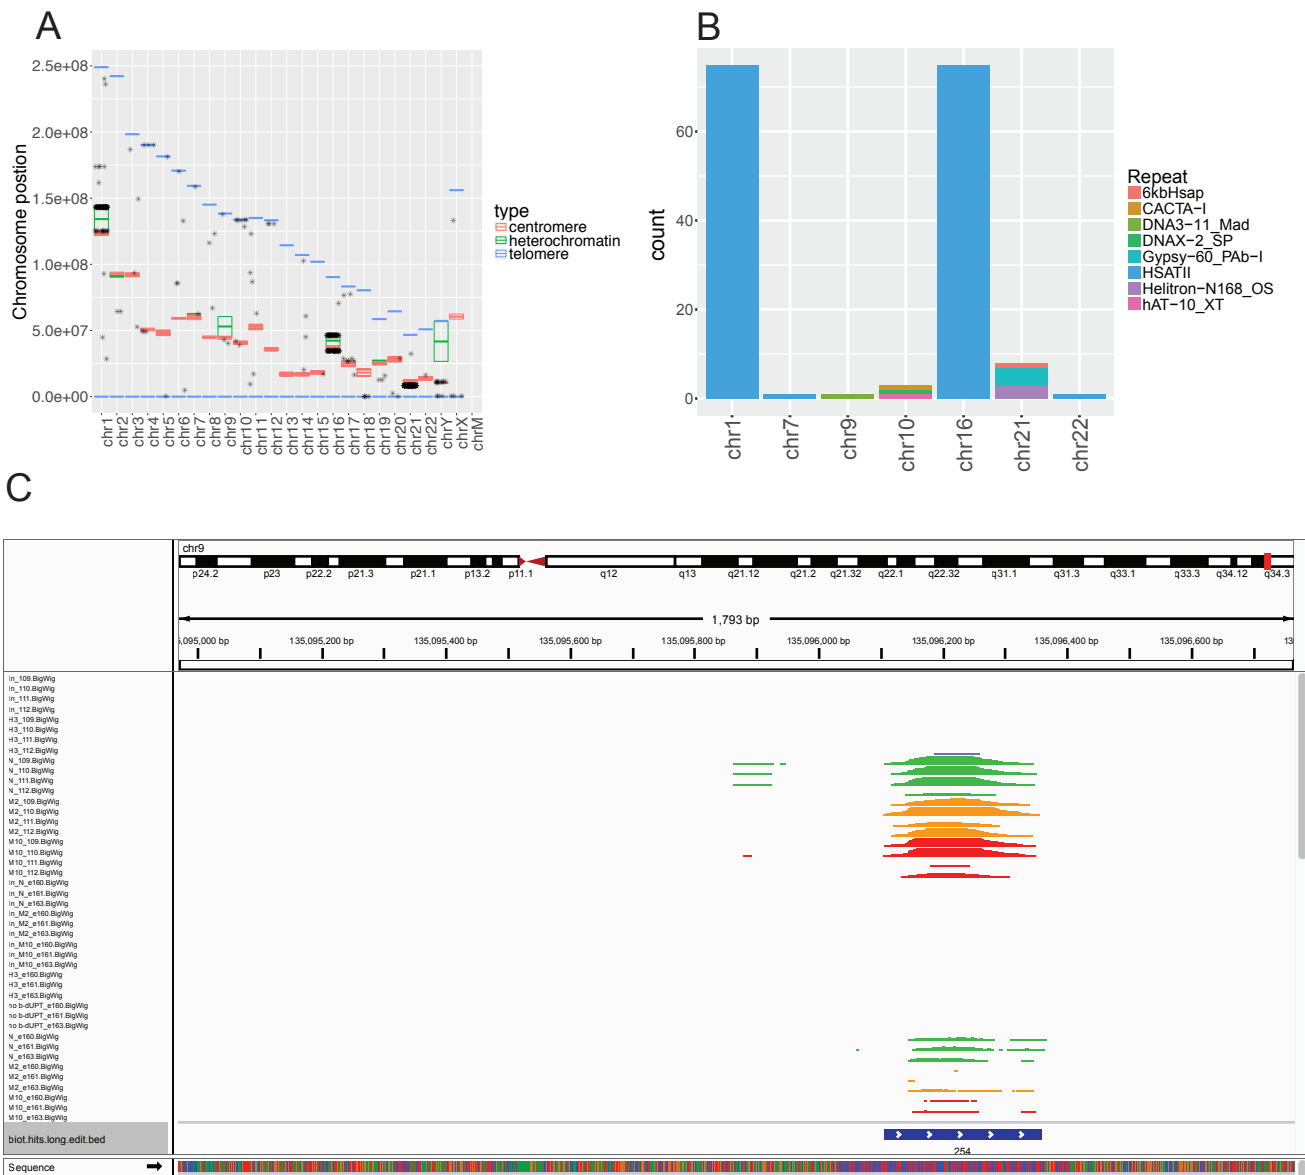

**Supplementary Fig. S3** Short RNA-seq repeat enrichment at centromeres and telomeres A) Short hits genomic location according to centromeres, telomeres and heterochromatin regions. B) NA (unannotated) short hits which contain or match repeats (Rebase repeatmasker) N=164. Plotted according to chromosome location and type of repeat. C) IGV tracks showing a GA repeat within a gene intron. This repeat is significantly enriched in the long hits (upper 20 tracks) but not in the short hits (lower 24 tracks).
