# Supplementary material for: Repeat RNAs associate with replication forks and post-replicative DNA
Source: PubMed Central journal article supplement — RNA. 2020 Sep;26(9):1104–17. doi: 10.1261/rna.074757.120 (PMC7430672; doi:10.1261/rna.074757.120), 2020-09
Supplement: supp_074757.120_Supplemental_Fig_S4.pdf [file supp_074757.120_Supplemental_Fig_S4.pdf]

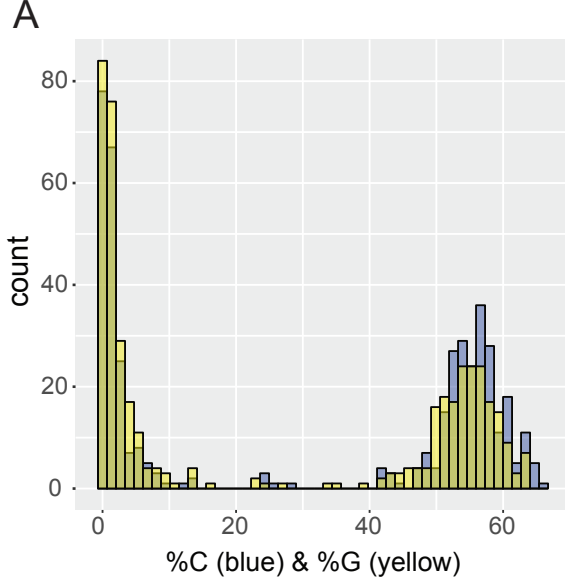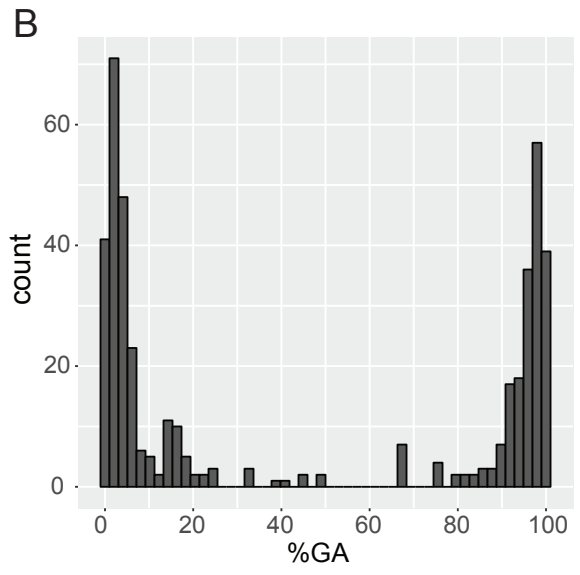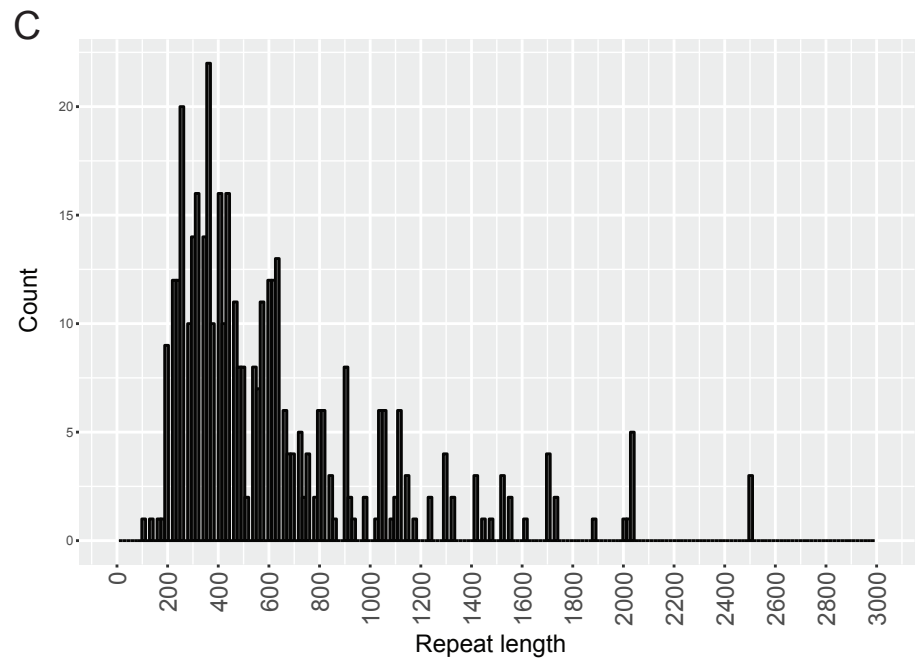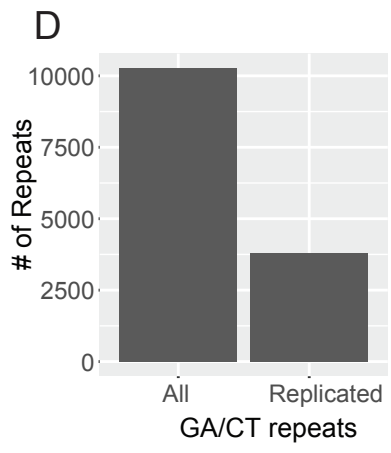

**Supplementary Fig. S4** Sequence analysis of GA-rich regions Long hits (without genes) n=435, A) G and C content and B) GA content. C) GA region length of regions present in long hits n=409. 14 hits not included on graph (>3000 bp). D) Genomic GA regions (n=10266) replicated at the time of labelling (n=3802).
